# Supplementary material for: Optimising the secondary use of primary care prescribing data to improve quality of care: a qualitative analysis
Source: HighWire-hosted journal article supplement (doi:10.1136/bmjopen-2022-062349), 2022-07-01
Supplement: bmjopen-2022-062349supp001_data_supplement.pdf [file bmjopen-2022-062349supp001_data_supplement.pdf]

## Optimizing the secondary use of primary care prescribing data to improve quality of care: a qualitative analysis

### Supplementary file 1: Interview topic guide

#### 1. Purpose of use of primary care prescribing data

- How does your organization currently use primary care prescribing data? Refer to the table on the following page (Supplementary file 2) listing core actors and purposes of use identified. Is this accurate and complete?
- How would you describe the information you need to carry-out your organization's role? (e.g. multi-year information on performance at national-level; aggregate, comparative performance measures on providers; timely, continuous information at patient-level, etc.).
- What actors do you work with directly in the scope of primary care prescribing data?

#### 2. Current use of prescribing data

- **Use of indicators.** Does your organization actively collect data related to the following: (1) Antibiotics; (2) Opioids; (3) Benzodiazepines. If so, what are the indicators or measures used related to each? How long have these been reported on? Is it intended for internal or external use? Who is the target audience (intended user) of the information generated?
- **Data sources.** What is your primary source of primary care prescribing data? (e.g. medical records, administrative data, specific research database, others). How is the data collected? If other actors are involved, whom does this include? Is the data considered of quality?
- **Analysis.** How is the data currently analyzed – benchmarking, time trend, international comparison? How would you describe this analysis? (e.g. time interval, comparators used, aggregation as composite scores, etc.)
- **Dissemination.** How is the data disseminated? What is the format of reporting (print, electronic, web-based)? What is the lag time in presenting analyzed data? How does it reach the intended target audience?

#### 3. Perceived actionability

- In your opinion, how can the process in which data is analyzed and reported on be improved upon?
- Is the information generated useful for your purposes? That is, are you able to make decisions and learn from the information?
- In general, what are the obstacles to the optimal use of primary care prescribing data at present?

**Supplementary file 2: Mapping of stakeholders and uses of prescribing data**

| <b>Purpose of use<sup>1</sup></b>                                                       | <b>Stakeholders</b>                                                                                                                                                                                |
|-----------------------------------------------------------------------------------------|----------------------------------------------------------------------------------------------------------------------------------------------------------------------------------------------------|
| <b>Micro-level</b>                                                                      |                                                                                                                                                                                                    |
| Individual professional performance                                                     | Individual GP and HIS supplier<br>Community pharmacist and HIS supplier                                                                                                                            |
| Practice improvement                                                                    | GP practice/peers using HIS<br>GP practice and insurers<br>GP practice and affiliate research networks<br>Community pharmacy and pharmacy network                                                  |
| Multidisciplinary improvement                                                           | Pharmacotherapy audit groups (GPs and pharmacists) (FTOs)                                                                                                                                          |
| <b>Meso-level</b>                                                                       |                                                                                                                                                                                                    |
| Organization/ networks performance improvement<br>Quality-based financing<br>Monitoring | Care groups and affiliate GP practices (e.g., MCC Omens Care Group, Zorg In Ontwikkeling)<br>Health Insurers (e.g., Zilveren Kruis)<br>Lareb Side Effects Center                                   |
| Professional development                                                                | Foundation of Pharmaceutical Statistics (SFK)<br>Dutch Institute for Responsible Drug Use (IVM)<br>National Association of GPs (LHV)                                                               |
| Advocacy and standards                                                                  | Dutch GP Association (NHG)<br>The Royal Dutch Society for the Promotion of Pharmacy (KNMP)<br><br>Organization for first line care (InEen)<br>Patient Federation Netherlands (Patienten Federatie) |
| <b>Macro-level</b>                                                                      |                                                                                                                                                                                                    |
| Strategy development                                                                    | Ministry of Health, Welfare and Sport                                                                                                                                                              |
| System performance                                                                      | National Institute for Public Health and the Environment (RIVM)                                                                                                                                    |
| System quality assurance                                                                | Medicines Evaluation Board (MEB)<br>National Health Care Institute (ZiNL)<br><br>Health Care Inspectorate (IGJ)<br>Dutch Healthcare Authority (NZa)                                                |
| <b>Cross-cutting</b>                                                                    |                                                                                                                                                                                                    |
|                                                                                         | Netherlands Institute for Health Services Research (Nivel)<br>Institute for Drug Outcomes Research (Pharmo)<br>Vektis<br>Nictiz<br>Digitalis                                                       |

<sup>1</sup>Purposes of use draw from the study findings: Barbazza E, Klazinga NS, Kringos DS. Exploring the actionability of healthcare performance indicators for quality of care: a qualitative analysis of the literature, expert opinion and user experience. *BMJ Quality & Safety* 2021;30:1010-1020.

## Supplementary file 3: Characteristics of informants

**Table S3.1.** Elaborated breakdown of informants and non-participants

| Characteristics                          | Total informants N=28 |    | Non-participants N=25 |              |                   |
|------------------------------------------|-----------------------|----|-----------------------|--------------|-------------------|
|                                          | n                     | %  | No reply              | Unavail-able | Contact mediating |
| <b>Healthcare system level (context)</b> |                       |    |                       |              |                   |
| Micro (clinical)                         | 1 (4)                 | 4  | 1                     | 2            | 1                 |
| Meso (organizational)                    | 11                    | 39 | 6                     | 0            | 5                 |
| Macro (policy)                           | 9                     | 32 | 3                     | 0            | 2                 |
| Cross-cutting (research, EHR supplier)   | 7                     | 25 | 2                     | 1            | 2                 |
| <b>Type of stakeholder</b>               |                       |    | <b>12</b>             | <b>3</b>     | <b>10</b>         |
| Association (patient, professional)      | 8                     | 29 | 3                     | 0            | 2                 |
| Care group (network)                     | 2                     | 7  | 0                     | 1            | 0                 |
| Government health agency                 | 9                     | 32 | 3                     | 0            | 2                 |
| Health professional                      | 1 (4)                 | 4  | 0                     | 1            | 1                 |
| EHR supplier                             | 4                     | 14 | 1                     | 0            | 2                 |
| Insurer                                  | 1                     | 4  | 3                     | 0            | 3                 |
| Research                                 | 3                     | 11 | 2                     | 1            | 0                 |
| <b>Gender</b>                            |                       |    |                       |              |                   |
| Female                                   | 8                     | 29 | 4                     | 2            | 4                 |
| Male                                     | 20                    | 71 | 8                     | 1            | 6                 |

EHR: Electronic health record.

<sup>a</sup>Numbers in round brackets indicate the total number of informants when individuals with multiple affiliations are accounted for.**Table S3.2.** Overview of informants

| #  | Code                  | Level         | Stakeholder                                                  | Gender | Format    |
|----|-----------------------|---------------|--------------------------------------------------------------|--------|-----------|
| 1  | Association-1         | Meso          | The Royal Dutch Society for the Promotion of Pharmacy (KNMP) | Female | Phone     |
| 2  | Health professional-2 | Micro         | Health Professional                                          | Male   | Phone     |
| 3  | Care group-3          | Meso          | MCC Omens Care Group                                         | Female | Phone     |
| 4  | Care group-4          | Meso          | ZIO                                                          | Female | Phone     |
| 5  | Government-5          | Macro         | Medicines Evaluation Board (MEB)                             | Male   | Phone     |
| 6  | EHR supplier-6        | Cross-cutting | Digitalis                                                    | Male   | In-person |
| 7  | Association-7         | Meso          | Organization of Firstline Care (InEen)                       | Male   | Phone     |
| 8  | Association-8         | Meso          | Dutch Institute for Responsible Drug Use (IVM)               | Female | Phone     |
| 9  | EHR supplier-9        | Cross-cutting | Nictiz                                                       | Male   | Written   |
| 10 | EHR supplier-10       | Cross-cutting | CampuGroup Medical (CGM)                                     | Male   | Phone     |
| 11 | Government-11         | Macro         | Ministry of Health, Welfare and Sport                        | Male   | Phone     |
| 12 | Association-12        | Meso          | Lareb Side Effects Center                                    | Male   | Phone     |
| 13 | Association-13        | Meso          | Foundation for Quality Indicators Pharmacy (SFK)             | Male   | Phone     |

Secondary uses of primary care prescribing data

Page 3 of 4

| #  | Code                 | Level         | Stakeholder                                                     | Gender | Format    |
|----|----------------------|---------------|-----------------------------------------------------------------|--------|-----------|
| 14 | Government–14        | Macro         | National Institute for Public Health and the Environment (RIVM) | Male   | Written   |
| 15 | Association–15       | Meso          | Dutch General Practitioners Association (NHG)                   | Male   | Phone     |
| 16 | Government–16        | Macro         | Health Care Inspectorate                                        | Male   | Phone     |
| 17 | Research–17          | Cross-cutting | Institute for Drug Outcomes Research (Pharmo)                   | Male   | Phone     |
| 18 | Association–18       | Meso          | Patient Federation                                              | Male   | Phone     |
| 19 | Insurer–19           | Meso          | Zilveren Kruis                                                  | Male   | Phone     |
| 20 | Association–20       | Meso          | National General Practitioners Association (LHV)                | Male   | Phone     |
| 21 | EHR supplier–21      | Cross-cutting | Vektis                                                          | Male   | Phone     |
| 22 | Government agency–22 | Macro         | National Health Care Institute                                  | Male   | Phone     |
| 23 | Government agency–23 | Macro         | Ministry of Health, Welfare and Sport                           | Male   | Phone     |
| 24 | Government agency–24 | Macro         | Dutch Healthcare Authority                                      | Female | Phone     |
| 25 | Government agency–24 | Macro         | Dutch Healthcare Authority                                      | Male   | Phone     |
| 26 | Research–25          | Cross-cutting | Netherlands Institute for Health Services Research              | Female | In-person |
| 27 | Research–25          | Cross-cutting | Netherlands Institute for Health Services Research              | Female | In-person |
| 28 | Government agency–26 | Macro         | National Institute for Public Health and the Environment (RIVM) | Female | Phone     |

EHR: Electronic health record.
